# Supplementary material for: Ferroelectric enhanced Ga2O3/BFMO-based deep ultraviolet photovoltaic detectors with dual electric fields for photogenerated carrier separation
Source: Royal Society of Chemistry journal article supplement (doi:10.1039/d3tc03244b), 2023-01-01
Supplement: d3tc03244b1.pdf [file d3tc03244b1.pdf]

## Supporting Information

### **Ferroelectric enhanced Ga<sub>2</sub>O<sub>3</sub>/BFMO-based deep ultraviolet photovoltaic detectors with dual electric fields for photogenerated carriers separation**

Yingying Cheng, Jiaxing Mao, Hongyi Zhu, Yanhui Dong, Jian Chen,\* Mingkai Li,  
Yinmei Lu,\* Yunbin He\*

Ministry of Education Key Laboratory of Green Preparation and Application for Functional Materials, Hubei Key Laboratory of Ferro & Piezoelectric Materials and Devices, Hubei Key Laboratory of Polymer Materials, School of Materials Science and Engineering, Hubei University, Wuhan 430062, China.

\*Corresponding authors :ybhe@hubu.edu.cn (Y. He); yinmei\_lu@hubu.edu.cn (Y. Lu); Phychenjian@163.com (J. Chen)

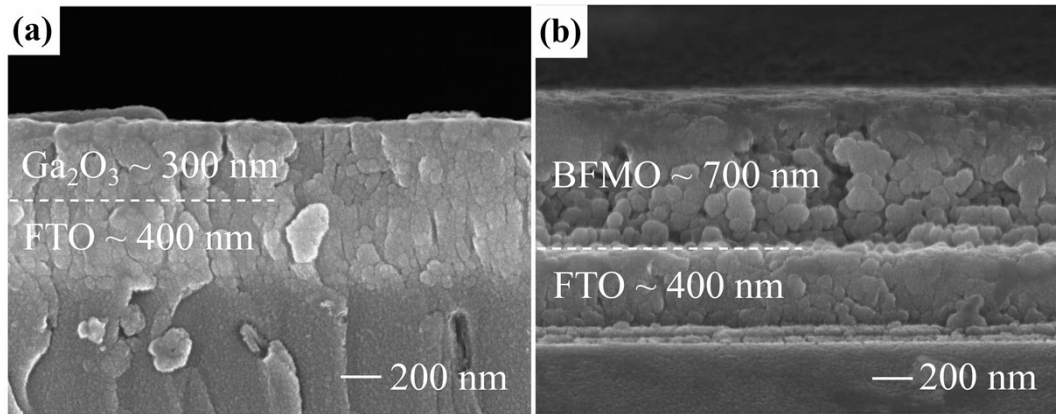

**Fig. S1.** Cross-sectional images of the (a)  $\text{Ga}_2\text{O}_3$  and (b) BFMO thin films.

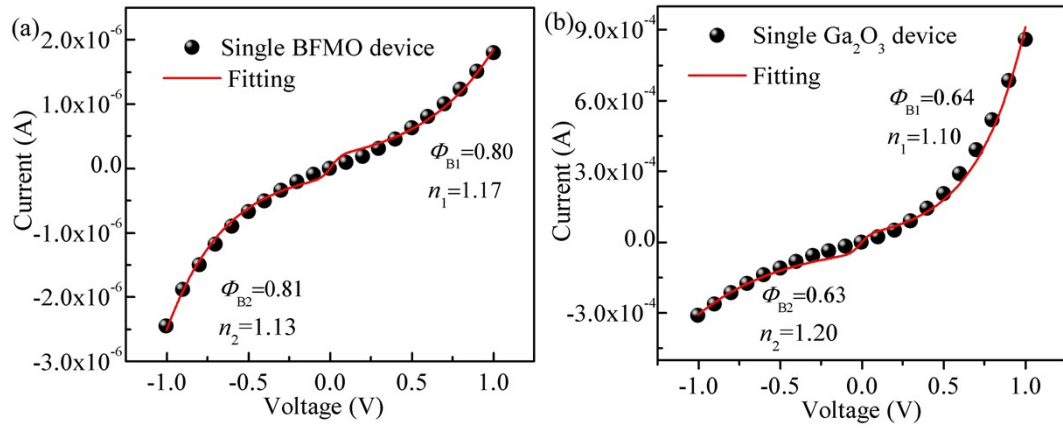

**Fig. S2.** Current-voltage ( $I$ - $V$ ) curves of the (a)  $\text{Ga}_2\text{O}_3$  and (b) BFMO devices under dark and their fits.
